# Supplementary material
Source: publisher site journal article supplement (https://www.spandidos-publications.com/8359/downloadSupplementary)
Supplement: Supplementary file 1 [file downloadSupplementary]

Table SI. Docking grid parameters used for molecular docking analysis.

| Protein<br>(PDB ID) | Target protein                  | Grid centre X | Grid centre<br>Y | Grid centre<br>Z | Size X<br>(Å) | Size Y (Å) | Size Z<br>(Å) |
|---------------------|---------------------------------|---------------|------------------|------------------|---------------|------------|---------------|
| 8ENQ                | <i>E. coli</i> CsgA fibril      | 92.5996       | 107.8450         | 25.1438          | 47.4822       | 37.8500    | 35.1224       |
| 5DFK                | <i>E. coli</i> EcpB chaperone   | -19.2250      | 23.0784          | -14.7058         | 55.0107       | 41.7817    | 51.5411       |
| 8FFK                | <i>K. pneumoniae</i> AcrB (apo) | 174.1170      | 209.8190         | 197.3941         | 64.7269       | 97.4887    | 122.0760      |
| 9HW9                | <i>K. pneumoniae</i> MrkA       | -1.2246       | 1.4784           | 1.5472           | 50.7000       | 53.6870    | 56.0285       |
